# Supplementary material for: Gold nanoclusters Au 25 AcCys 18 normalize intracellular ROS without increasing cytoplasmic alarmin acHMGB1 abundance in human microglia and neurons
Source: Royal Society of Chemistry journal article supplement (doi:10.1039/d4nr03512g), 2024-11-28
Supplement: d4nr03512g1.pdf [file d4nr03512g1.pdf]

## Supplementary Information

### **Gold nanoclusters Au<sub>25</sub>AcCys<sub>18</sub> normalize intracellular ROS without increasing cytoplasmic alarmin acHMGB1 abundance in human microglia and neurons**

Issan Zhang<sup>1</sup>, Dusica Maysinger<sup>1,\*</sup>, Maja Beus<sup>1</sup>, Antonija Mravak<sup>2</sup>, Ziqi Yu<sup>3,4</sup>, Martina Perić Bakulić<sup>5,6</sup>, Patrick Dion<sup>4</sup>, Guy Rouleau<sup>4</sup>, Vlasta Bonačić-Koutecký<sup>6,7</sup>, Rodolphe Antoine<sup>8</sup>, Željka Sanader Maršić<sup>2,6\*</sup>

<sup>1</sup>Department of Pharmacology and Therapeutics, McGill University, 3655 Promenade Sir-William-Osler, H3G 1Y6 Montreal, Canada

<sup>2</sup>Faculty of Science, University of Split, Rudera Boskovicica 33, 21000 Split, Croatia

<sup>3</sup>Division of Experimental Medicine, Faculty of Medicine, McGill University, Montreal, QC, Canada.

<sup>4</sup>Montreal Neurological Institute, Department of Neurology and Neurosurgery, McGill University, Montreal, QC, Canada.

<sup>5</sup>Faculty of Chemistry and Technology, University of Split, Ruđera Boškovića 35, 21000 Split, Croatia

<sup>6</sup>Center of Excellence for Science and Technology, Integration of Mediterranean Region (STIM), Faculty of Science, University of Split, Ruđera Boškovića 33, 21000 Split, Croatia

<sup>7</sup>Chemistry Department, Humboldt University of Berlin, Brook-Taylor-Strasse 2, 12489 Berlin, Germany

<sup>8</sup>Institut Lumière Matière, CNRS UMR 5306, Université Claude Bernard Lyon 1, Univ. Lyon, 69622 Villeurbanne Cedex, France

\*Corresponding authors:

Dr. Dusica Maysinger: [dusica.maysinger@mcgill.ca](mailto:dusica.maysinger@mcgill.ca)

Dr. Željka Sanader Maršić: [zsm@pmfst.hr](mailto:zsm@pmfst.hr)

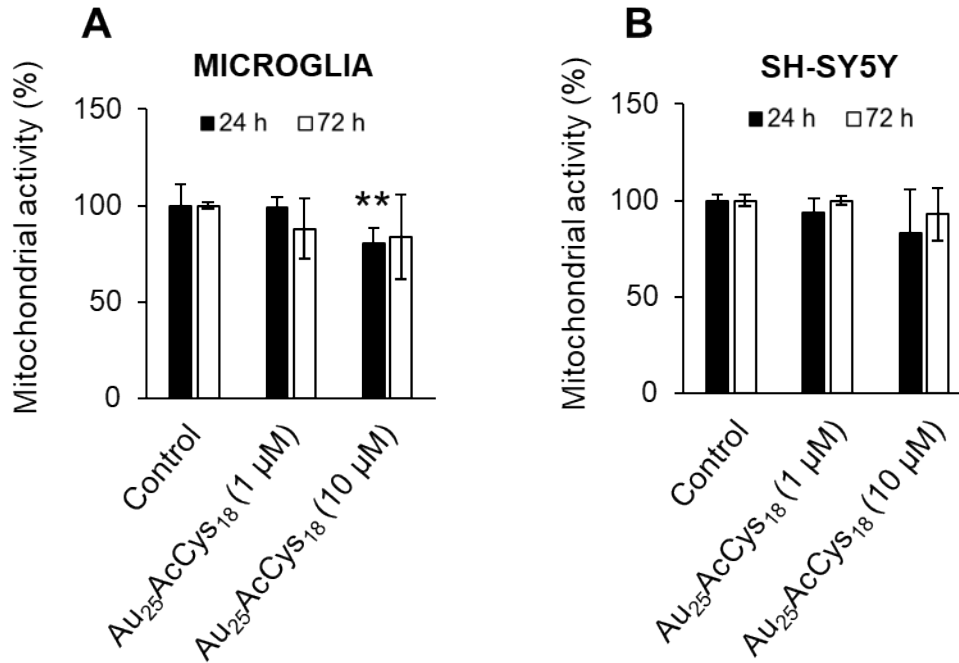

Fig. S1 Mitochondrial metabolic activity of (a) human microglia and (b) differentiated SH-SY5Y neuronal cells after 24 h and 72 h. The average mitochondrial metabolic activity was determined by the MTT assay and normalized to the untreated control (set to 100%)  $\pm$ SD. \*\*  $p < 0.01$

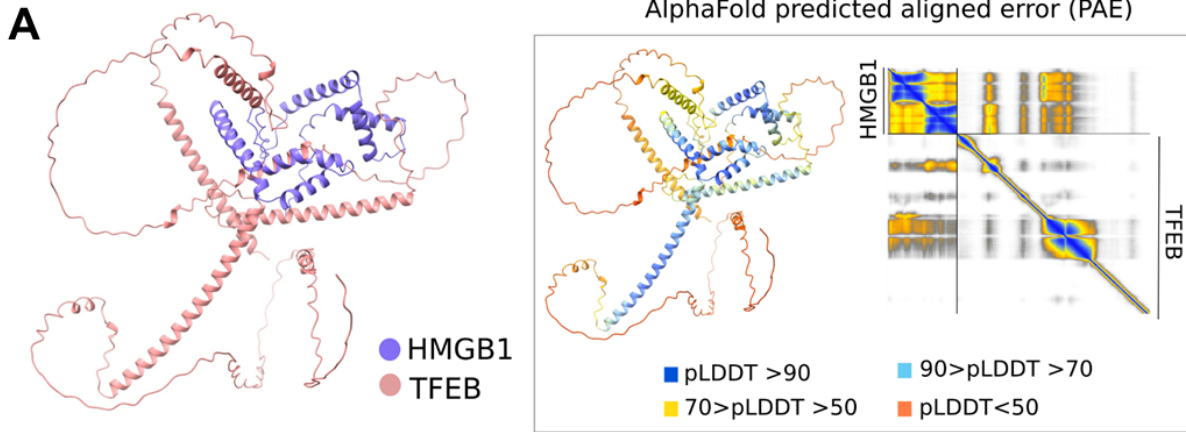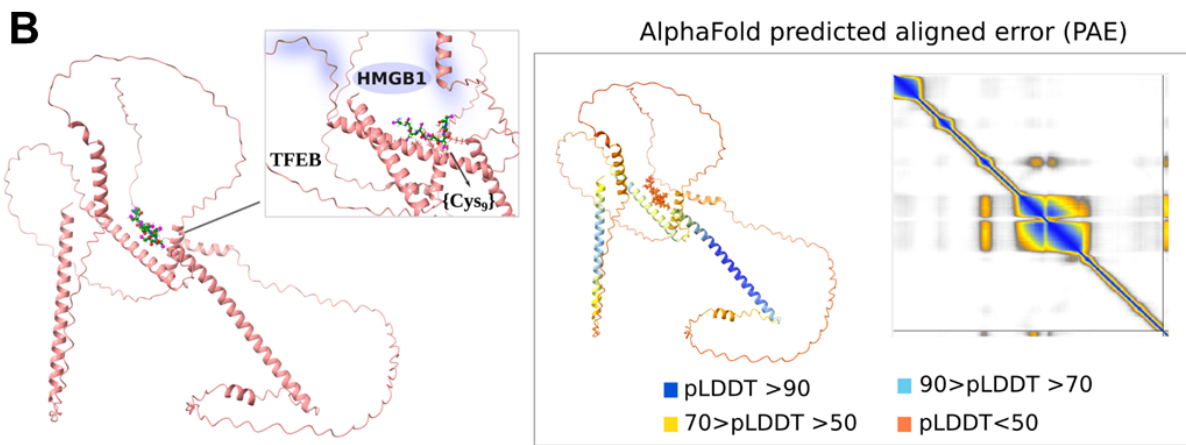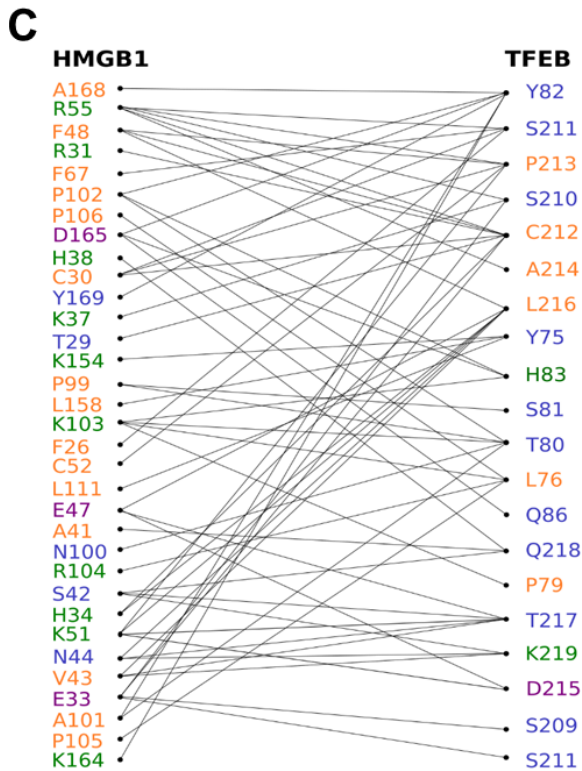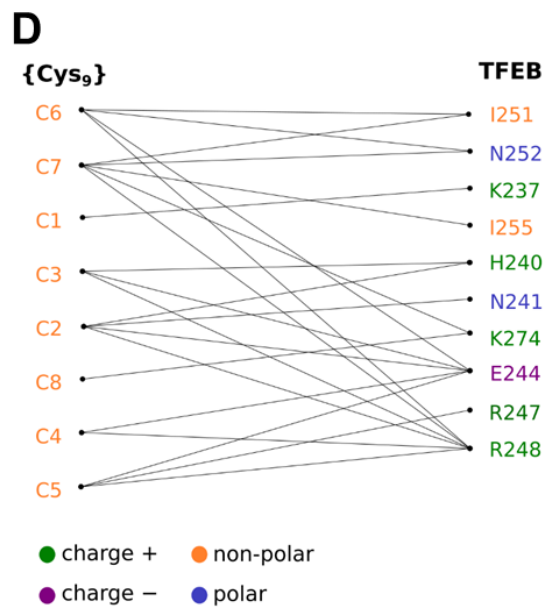

**Fig. S2** (a) AlphaFold-predicted structure of HMGB1 interacting with TFEB (left) and the corresponding predicted aligned error (PAE) (right). (b) AlphaFold-predicted structure of TFEB interacting with {Cys<sub>9</sub>}, with an enlarged view showing the interaction area between TFEB and HMGB1 (blue). The interaction of {Cys<sub>9</sub>} and TFEB occurs at different position. The corresponding PAE for this structure is shown on the right. (c) Predicted amino acid contacts between HMGB1 and TFEB. On the left side of the diagram are listed all the amino acids from HMGB1 that form interactions with amino acids from the TFEB (on the right side). (d) Predicted amino acid contacts between {Cys<sub>9</sub>} (left side of the diagram) and TFEB (right side of the diagram). Notice that different amino acids are involved in TFEB interaction with {Cys<sub>9</sub>} and HMGB1, shown in (c).
